# Supplementary material for: Electrochemical nucleation and growth of Pt nanoflower particles on reduced graphite oxide with electrooxidation of glucose
Source: Royal Society of Chemistry journal article supplement (doi:10.1039/d0ay00021c), 2020-01-01
Supplement: d0ay00021c1.pdf [file d0ay00021c1.pdf]

## Supporting Information

### **Electrochemical nucleation and growth of Pt nanoflower particles on reduced graphite oxide for electrooxidation of glucose**

**Gengan Saravanan<sup>1,2,\*</sup> and Subramanian Mohan<sup>3</sup>**

<sup>1,\*</sup> Department of Chemistry, Koneru Lakshmaiah Education Foundation, Hyderabad- 500075, Telangana, India, [saravanan3che@gmail.com](mailto:saravanan3che@gmail.com) and [saravanan@klh.edu.in](mailto:saravanan@klh.edu.in)

<sup>2</sup> Yonsei University, 50 Yonsei-ro, Sinchon-dong, Seodaemun-gu, Seoul-120749, South Korea

<sup>3</sup> EMFT Division, CSIR-Central Electrochemical Research Institute, Tamil Nadu, Karaikudi 630 006, India

| Number      | Description                                                        | Page Number |
|-------------|--------------------------------------------------------------------|-------------|
| S1 A, B & C | Plot of charge vs. Time                                            | 2-4         |
| S2 A, B & C | SEM images of GO (A), rGO (B) and TEM (C) images of rGO nano sheet | 5-7         |
| S2          | EDX spectra of PtNFP-Rgo/GCE                                       | 8           |

**Figure S1 A.** Plot of charge versus time obtained from i-t curves

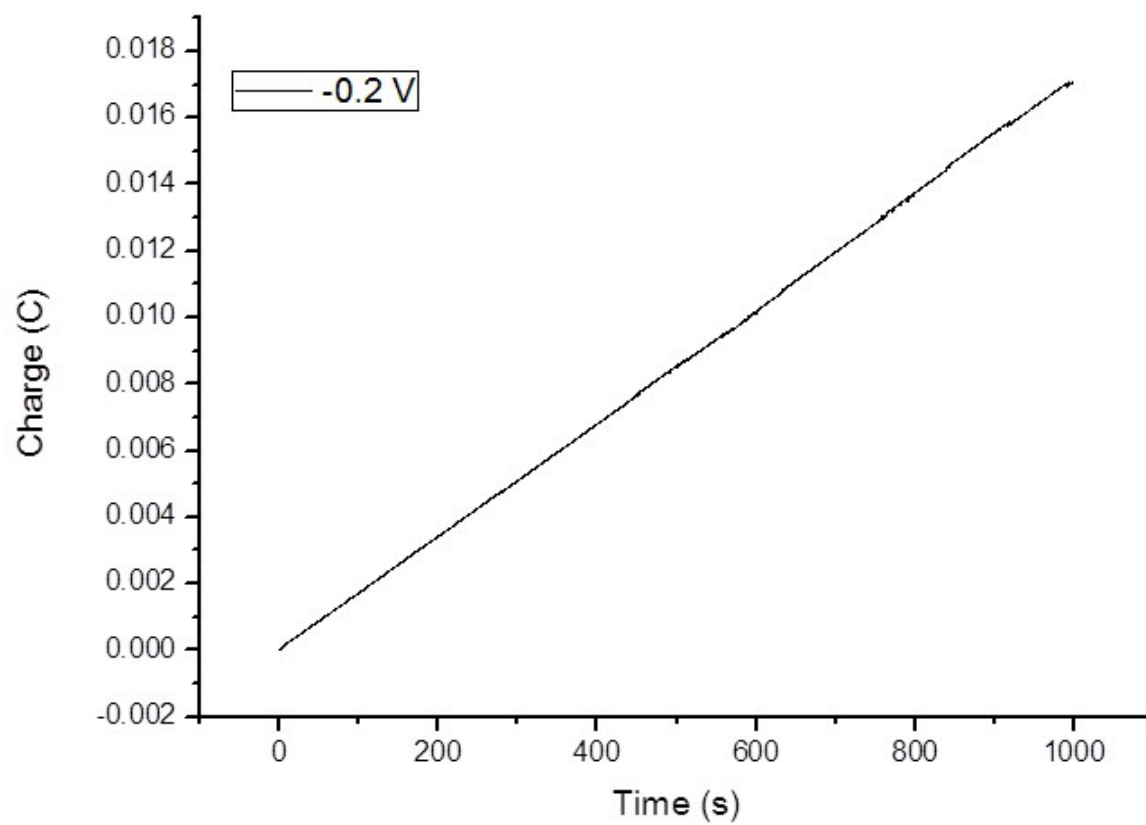

**Figure S1 B.** Plot of charge versus time obtained from i-t curves

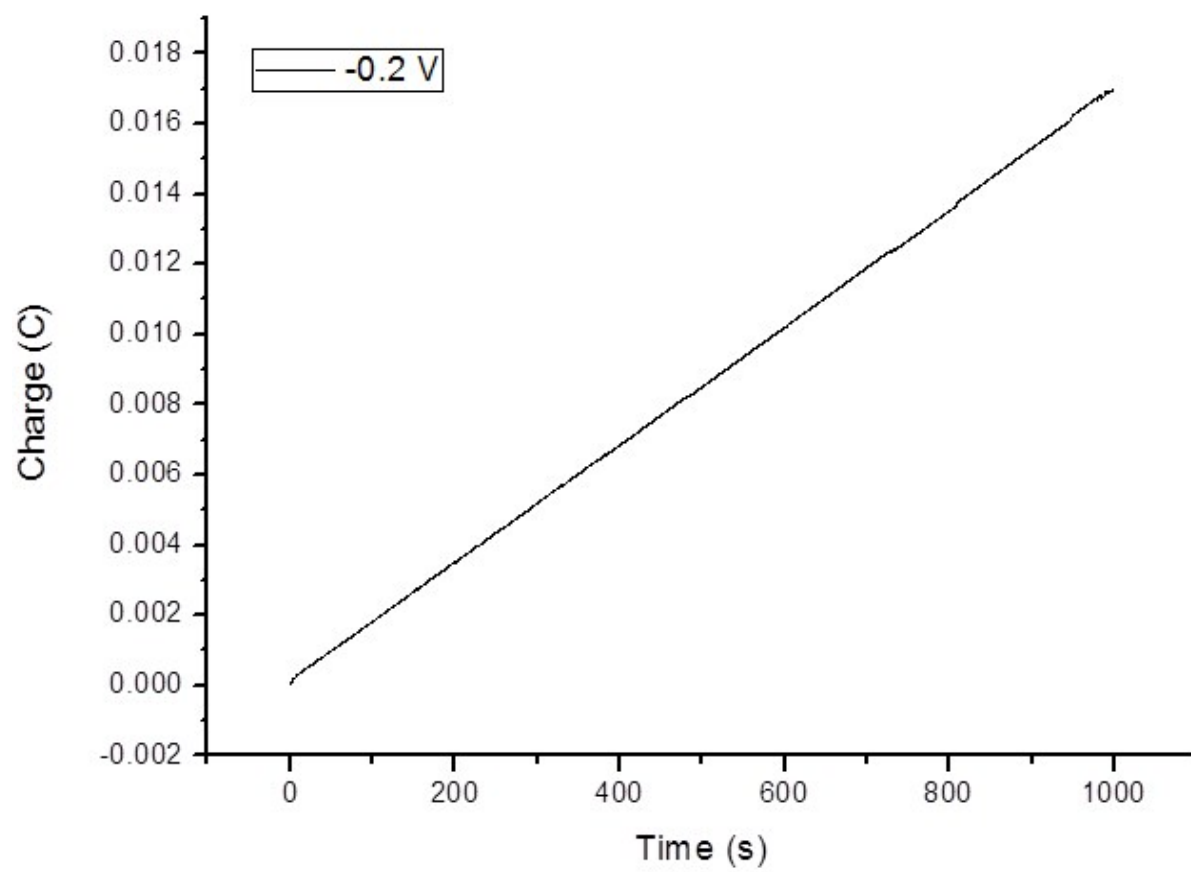

**Figure S1 C.** Plot of charge versus time obtained from i-t curves

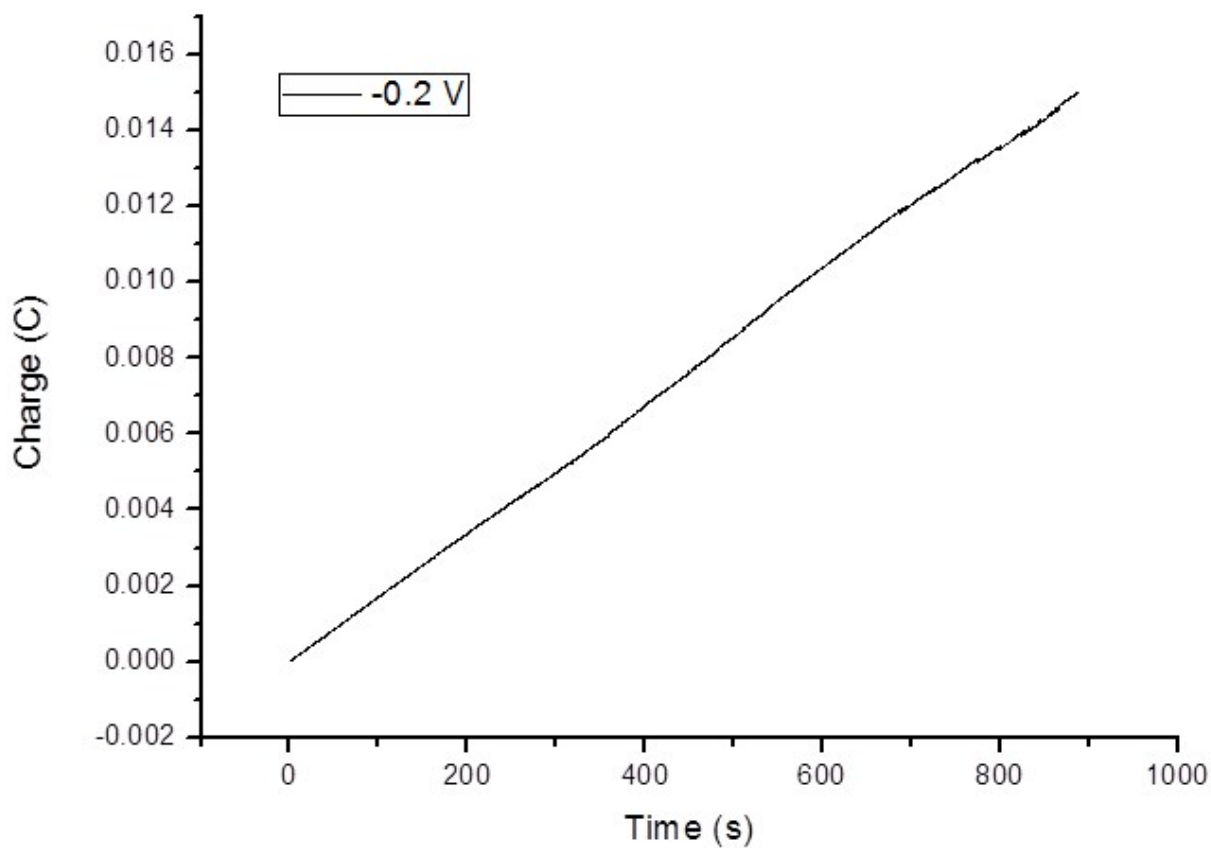

**Figure S1 (A), B and (C).** Presents Pt loading on ECRGO/GCE was determined by charge integrated during the Pt deposition. <sup>[1]</sup> The charge for the deposition of Pt was 0.0488 C corresponding to the Pt loading of 24.68  $\mu\text{g}$  for 2890 s at -0.2 V

$$m = Q \times M/F \times Z$$

$$m = 0.0488 \times 195.08 / 96500 \times 4$$

$$m = 24.68 \mu\text{g of Pt}$$

**Figure S2 (A)**

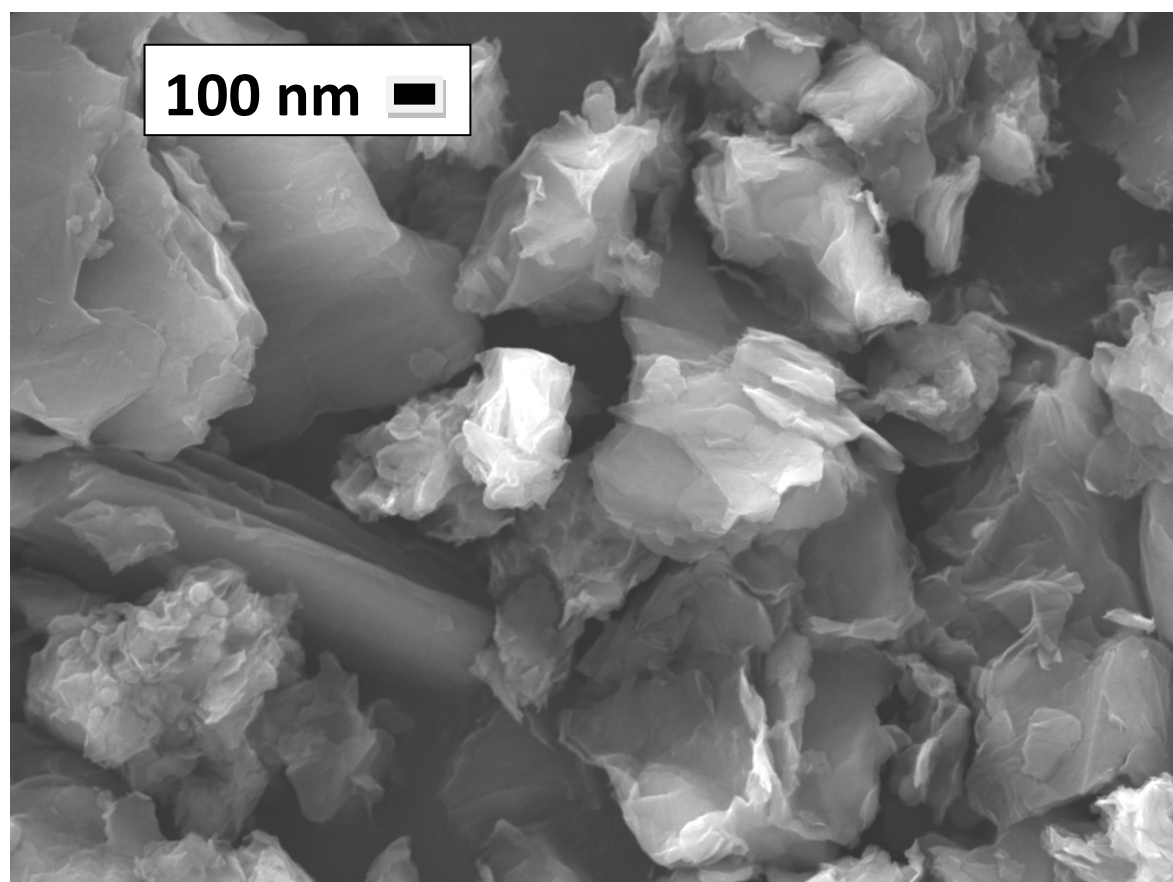

A

Figure. S2 (A) SEM image of as-synthesized GO film.

**Figure S2 B**

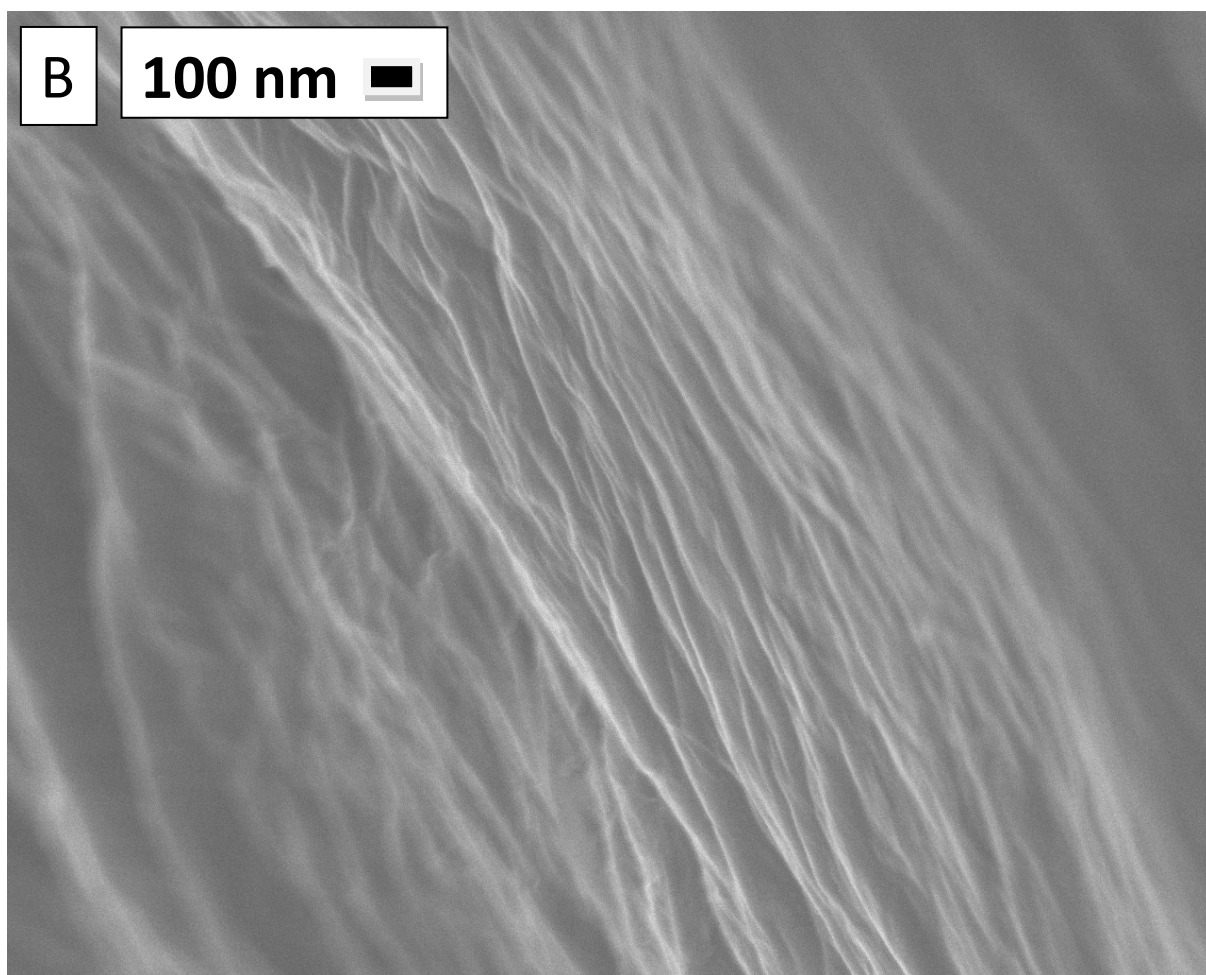

Figure. S2 (B) SEM image of electrochemically synthesized rGO

**Figure S2 (C)**

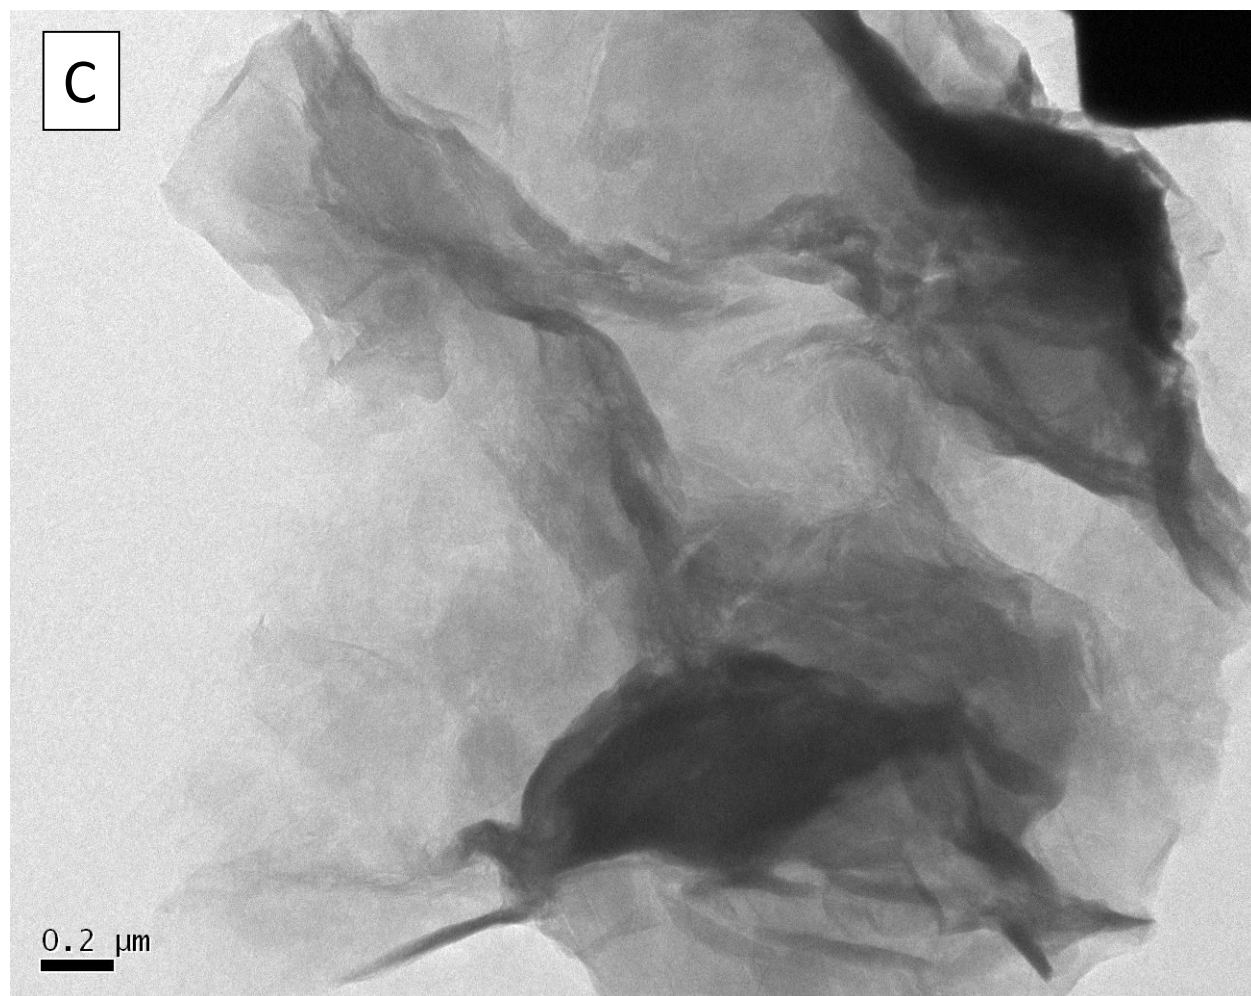

**Figure. S2 (C)** TEM image of electrochemically reduced GO to rGO sheet.

**Figure S3.**

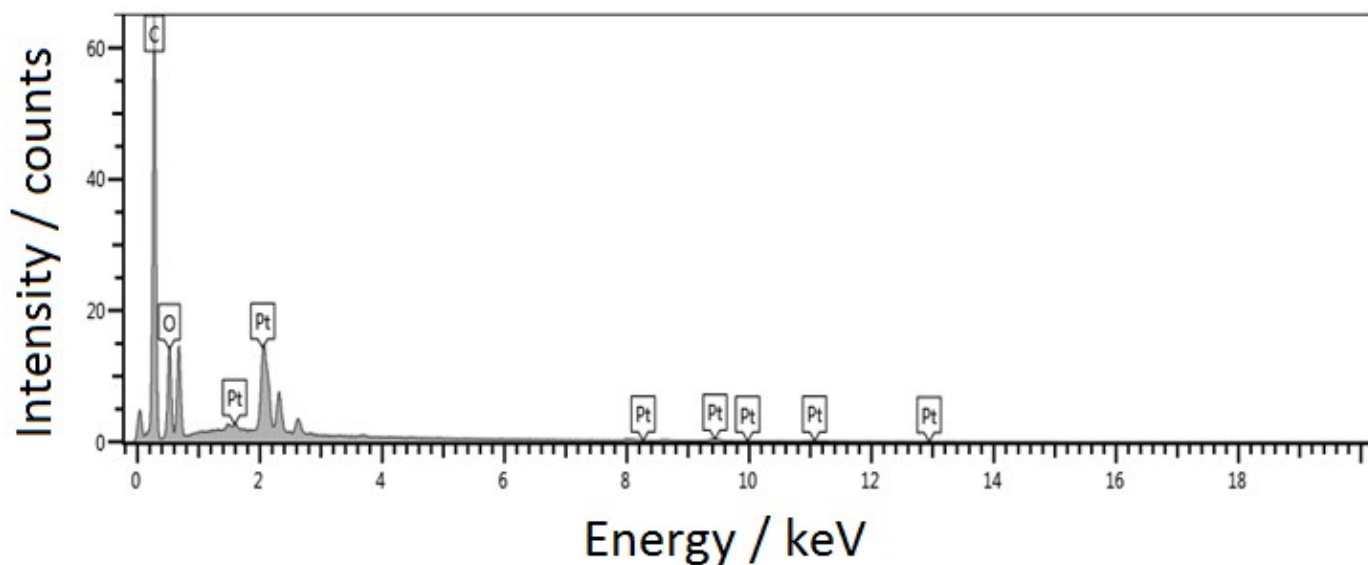

**Figure S3.** EDX spectra of electrodeposited PtNFPs at -0.2 V in 1.0 mM  $\text{H}_2\text{PtCl}_6$  + 0.5M  $\text{H}_2\text{SO}_4$  electrolyte solution.

#### Reference

1. Kuo, C-W.; Huang, L-M.; Wen, T-C.; Gopalan, A., Enhanced electrocatalytic performance for methanol oxidation of a novel Pt-dispersed poly(3,4-ethylenedioxythiophene)-poly (styrene sulfonic acid) electrode. *J. Power Sources* **2006**, *160*, 65-72.
